# Supplementary material
Source: publisher site journal article supplement (https://www.dovepress.com/article/480734)
Supplement: Supplementary file 1 [file get_supplementary_file.php]

**Supplementary materials**

**Supplementary Figure 1** Distribution of bispectral index with the remimazolam effect-site concentration.


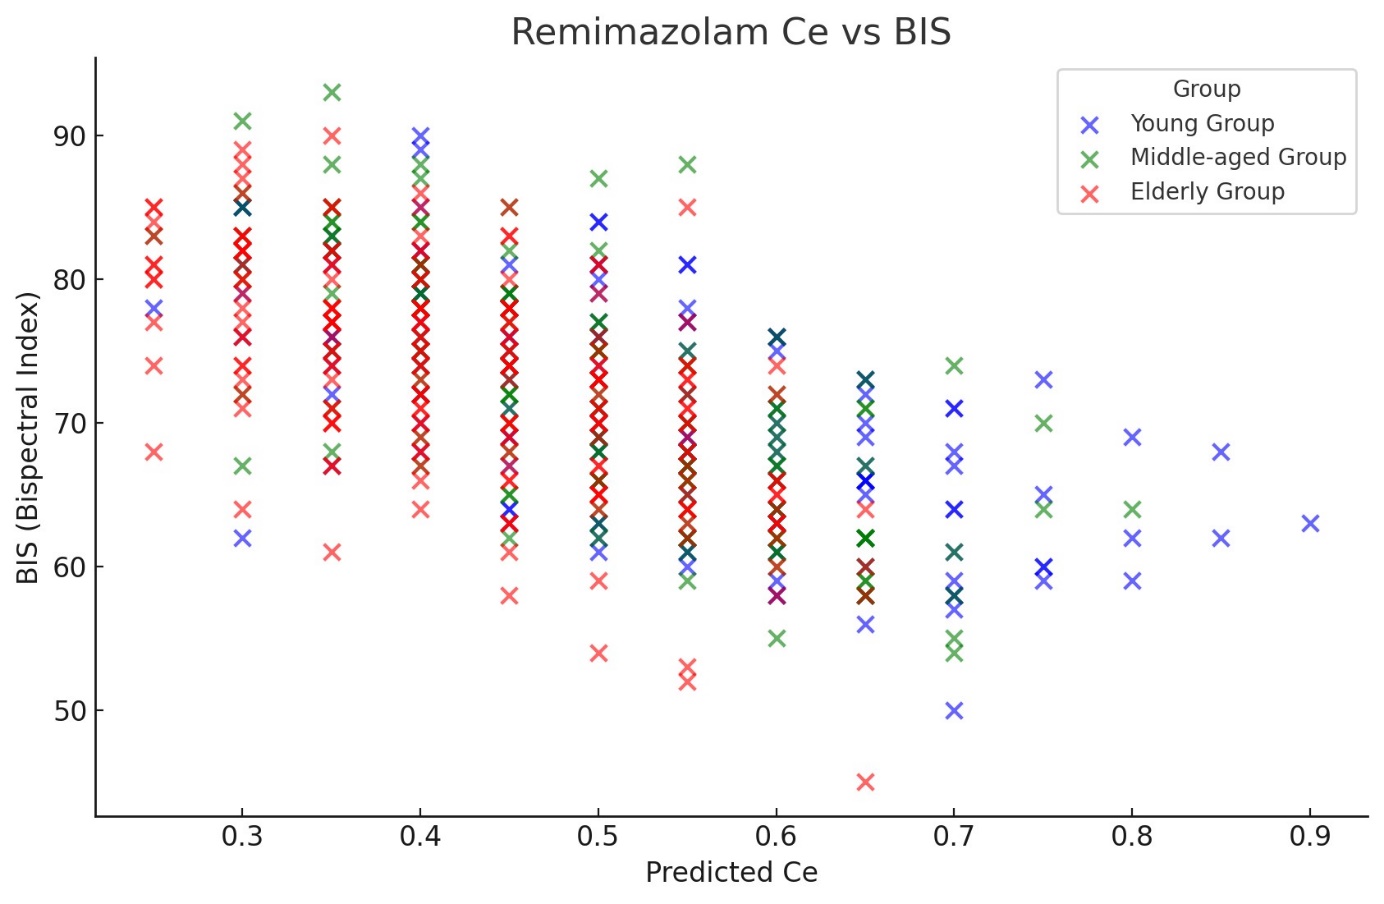


The x marks represent the raw data observed from all patients. Ce, effect-site concentration of remimazolam.

**Supplementary Figure 2** Relationship between the remimazolam effect-site concentration and sedation level.


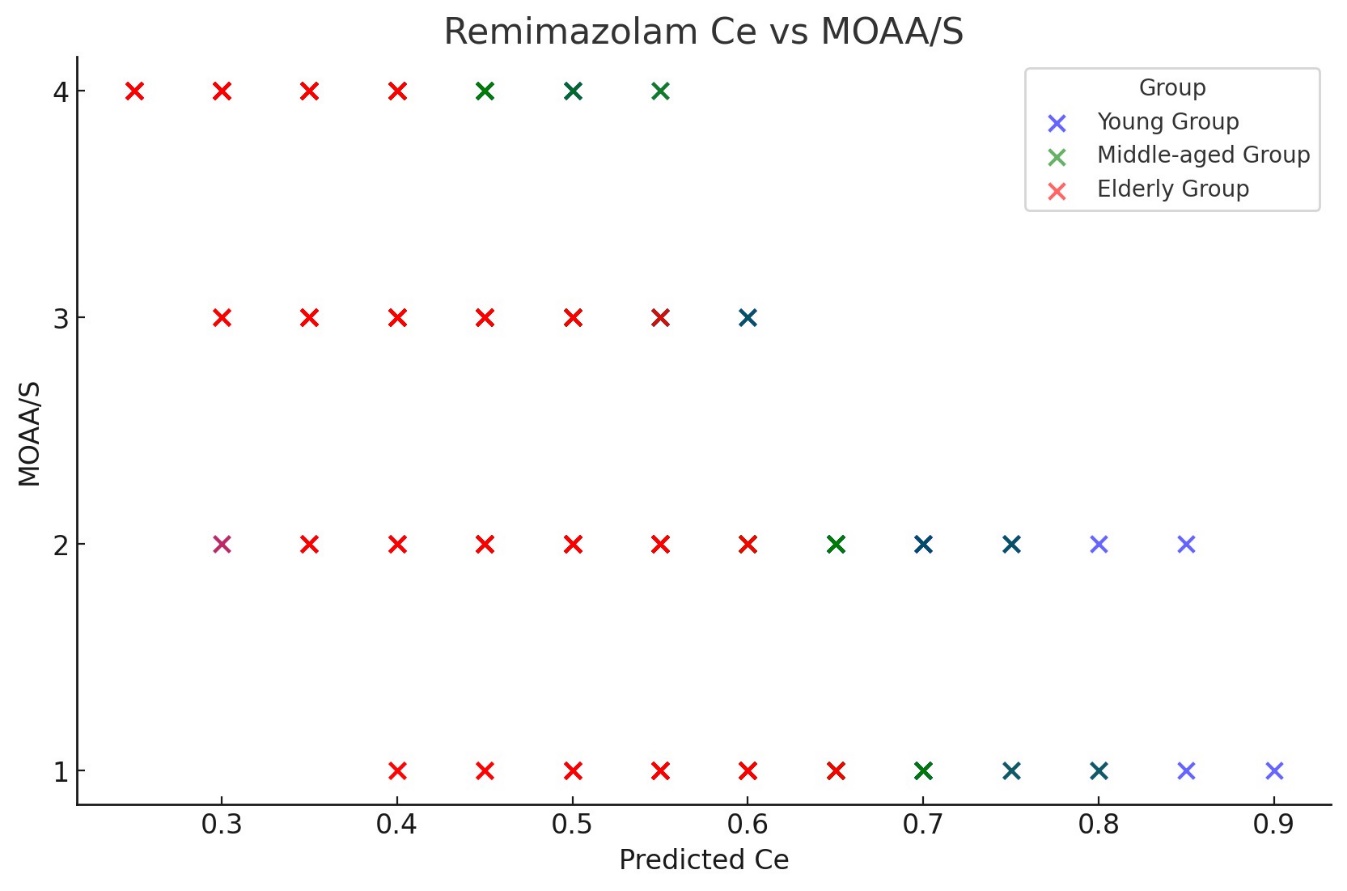


The x marks represent the raw data observed from all patients. Ce, effect-site concentration of remimazolam; MOAA/S: Modified Observer’s Assessment of Alertness/Sedation scale.
